# Supplementary material for: Fabrication of large-scale single-crystal bismuth telluride (Bi2Te3) nanosheet arrays by a single-step electrolysis process
Source: Royal Society of Chemistry journal article supplement (doi:10.1039/c4nr00184b), 2014-01-01
Supplement: c4nr00184b1.pdf [file c4nr00184b1.pdf]

## Supplementary information

### ***Fabrication of Large Scale Single Crystal Bismuth Telluride (Bi<sub>2</sub>Te<sub>3</sub>) Nanosheet Arrays by Single Step Electrolysis Process***

Hung-Wei Tsai,<sup>1</sup>Tsang-Hsiu Wang,<sup>1</sup>Tsung-Cheng Chan,<sup>1</sup>Pei-Ju Chen,<sup>2</sup>Chih-Chun Chung,<sup>1</sup>Alireza Yaghoubi<sup>3</sup>, Chien-Neng Liao,<sup>1</sup>Eric Wei-Guang Dia<sup>2</sup>, and <sup>1</sup>Yu-Lun Chueh<sup>1,4\*</sup>

<sup>1</sup>*Department of Materials Science and Engineering, National Tsing Hua University, Hsinchu, 30013, Taiwan*

<sup>2</sup>*Department of Applied Chemistry, National Chiao Tung University, Hsinchu 30010, Taiwan*

<sup>3</sup>*Centre for High Impact Research, University of Malaya, Kuala Lumpur 50603, Malaysia.*

<sup>4</sup>*Center For Nanotechnology, Material Science, and Microsystem, ational Tsing Hua University, Hsinchu, 30013, Taiwan*

*\*E-mail: ylchueh@mx.nthu.edu.tw*

### **Calcualtion of the bond energies of Te<sup>(1)</sup>-Bi, Te<sup>(2)</sup>-Bi, and Te<sup>(1)</sup>- Te<sup>(1)</sup> in Bi<sub>2</sub>Te<sub>3</sub> :**

According to the calculation results of Kaviany and co-workers, the calculated bond energies of Te<sup>(1)</sup>-Bi, Te<sup>(2)</sup>-Bi, and Te<sup>(1)</sup>- Te<sup>(1)</sup> in Bi<sub>2</sub>Te<sub>3</sub> can be obtained as shown in below.

For Te<sup>(1)</sup> atom: bonds with three Bi and three Te<sup>(1)</sup> atoms

$$\Rightarrow 3 \times 0.974 + 3 \times 0.0691 = 3.1293 \text{ eV}$$

For Te<sup>(2)</sup> atom: bonds with six Bi atoms

$$\Rightarrow 6 \times 0.5801 = 3.4806 \text{ eV}$$

For Bi atom: bonds with three Te<sup>(1)</sup> and three Te<sup>(2)</sup> atoms

$$\Rightarrow 3 \times 0.974 + 3 \times 0.5801 = 4.6623 \text{ eV}$$

### **Existence of H<sub>2</sub>Te gas during the electrolysis process**

In order to prove the existence of H<sub>2</sub>Te gas during the electrolysis process, we design an experiment as shown in Figure S1 (a). A Si substrate was suspended upon the electrolyte while doing the electrolysis process and the tellurium was formed by the decomposition of H<sub>2</sub>Te gas<sup>[1]</sup>. Figure S1 (b) shows the schematics of formation of H<sub>2</sub>Te derived Te, and the reaction process can be visualized as below:

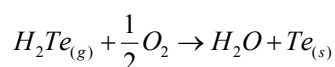

The  $\text{H}_2\text{Te}$  derived Te was distinguished by Raman spectrum. In the Raman spectrum of  $\text{H}_2\text{Te}$  derived Te, three peaks are located at 92.4, 121.6, and 141.1  $\text{cm}^{-1}$ , corresponding to optical modes of  $E^l$ ,  $A_1$ , and  $E^u$ , respectively<sup>[2]</sup>, as shown in Figure S1(d). These three peaks are consistent with the results from pure Te ingot. The SEM image of  $\text{H}_2\text{Te}$  derived Te is shown in Figure S1(c) and reveals the blade shape.

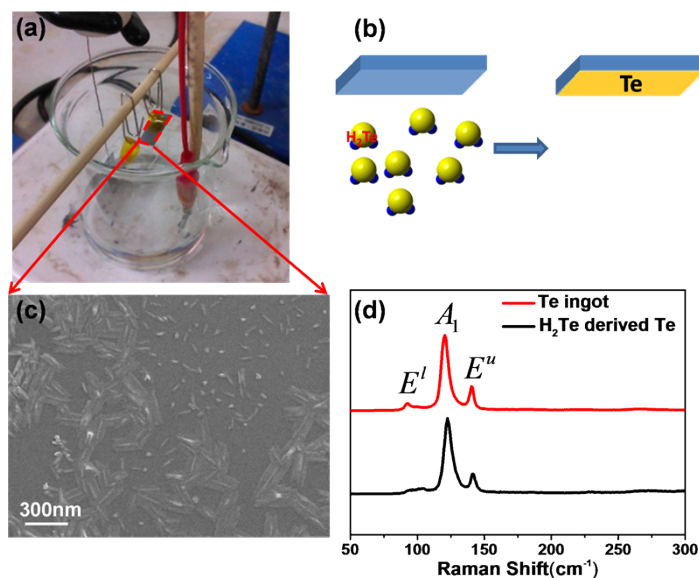

**Figure S1.** (a) Suspended Si substrate upon the electrolyte. (b) Schematics of  $\text{H}_2\text{Te}$  derived Te. (c) SEM image of  $\text{H}_2\text{Te}$  derived Te. (d) Raman spectrum of Te ingot and  $\text{H}_2\text{Te}$  derived Te.

## REFERENCES

- [1] T. Engelhard, E. D. Jones, I. Viney, Y. Mastai, G. Hodes, *Thin Solid Films* **2000**, 370, 101-105.
- [2] B. H. Torrie, *Solid State Communications* **1970**, 8, 1899-1901.
